# Supplementary material for: Interleukin-22 regulates neutrophil recruitment in ulcerative colitis and is associated with resistance to ustekinumab therapy
Source: PubMed Central journal article supplement (PMC9530232; doi:10.1038/s41467-022-33331-8), 2022-10-03
Supplement: 41467_2022_33331_MOESM1_ESM.pdf [file 41467_2022_33331_MOESM1_ESM.pdf]

## Supplementary Figure 1

### a Mucosal healing

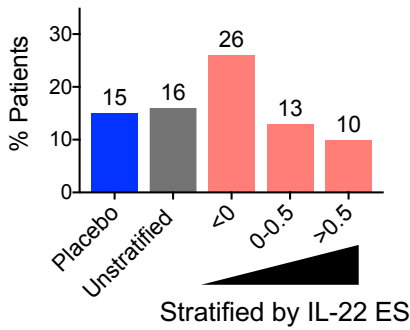

### b

#### Clinical Remission

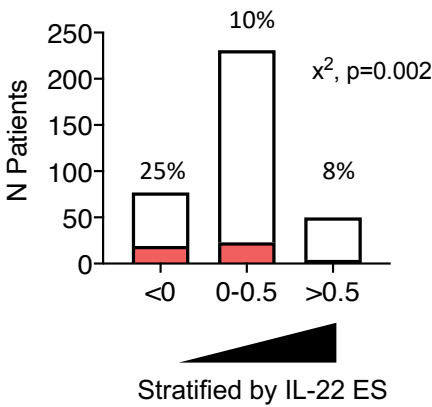

#### Mucosal healing

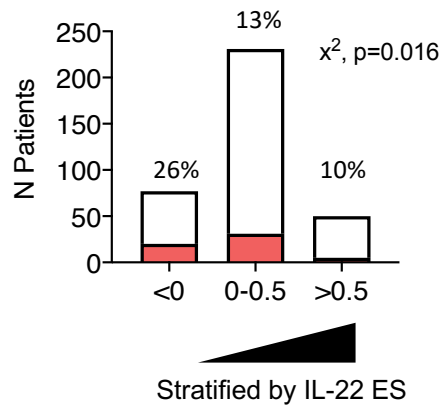

#### Deep Remission

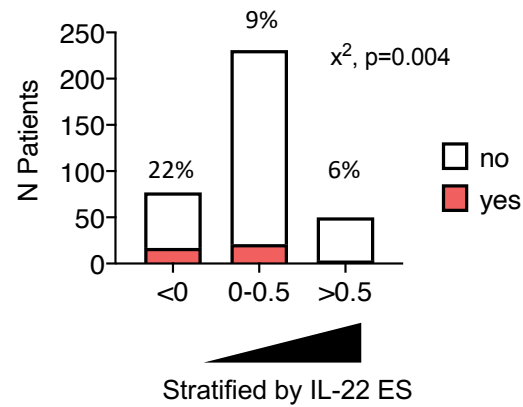

### c

#### Clinical Remission

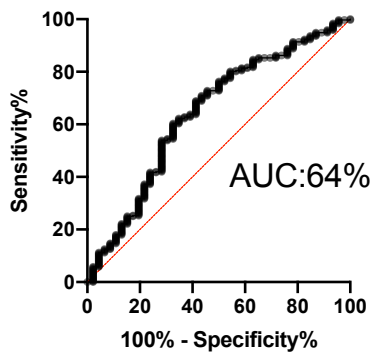

#### Mucosal healing

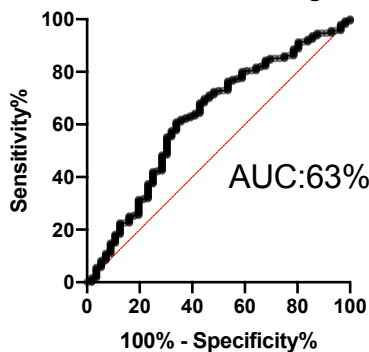

#### Deep Remission

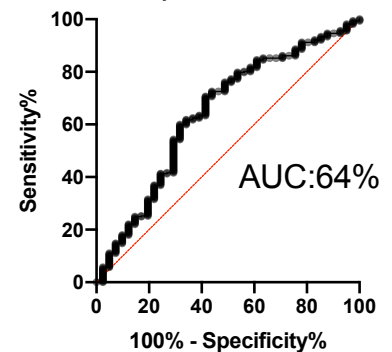

**Supplementary Figure 1. Expression of IL-22 transcriptional modules in colonic biopsies associates with response to ustekinumab in ulcerative colitis.** (a) Mucosal healing defined as histologic improvement (neutrophil infiltration in <5% of crypts, no crypt destruction, and no erosions, ulcerations, or granulation tissue) and endoscopic improvement (total Mayo score of  $\leq 2$  and no subscore  $>1$ ) at week 8 in UC patients enrolled in the UNIFI clinical trial program stratified according to IL22 enrichment score in baseline biopsies sampled immediately prior to initiation of ustekinumab or placebo. (b) Outcome rates as number of patients and frequency per IL-22 enrichment score (ES) stratum in ustekinumab treated patients (UNIFI, n=358, contingency table-  $\chi^2$  analysis, two tailed test). (c) Receiver operator characteristic curve analysis for the IL22 enrichment score to predict outcomes at week 8 in ustekinumab treated patients participating in UNIFI (n=358), AUC: area under the curve. Source data for a, b and c are provided as a Source Data file.

## Supplementary Figure 2

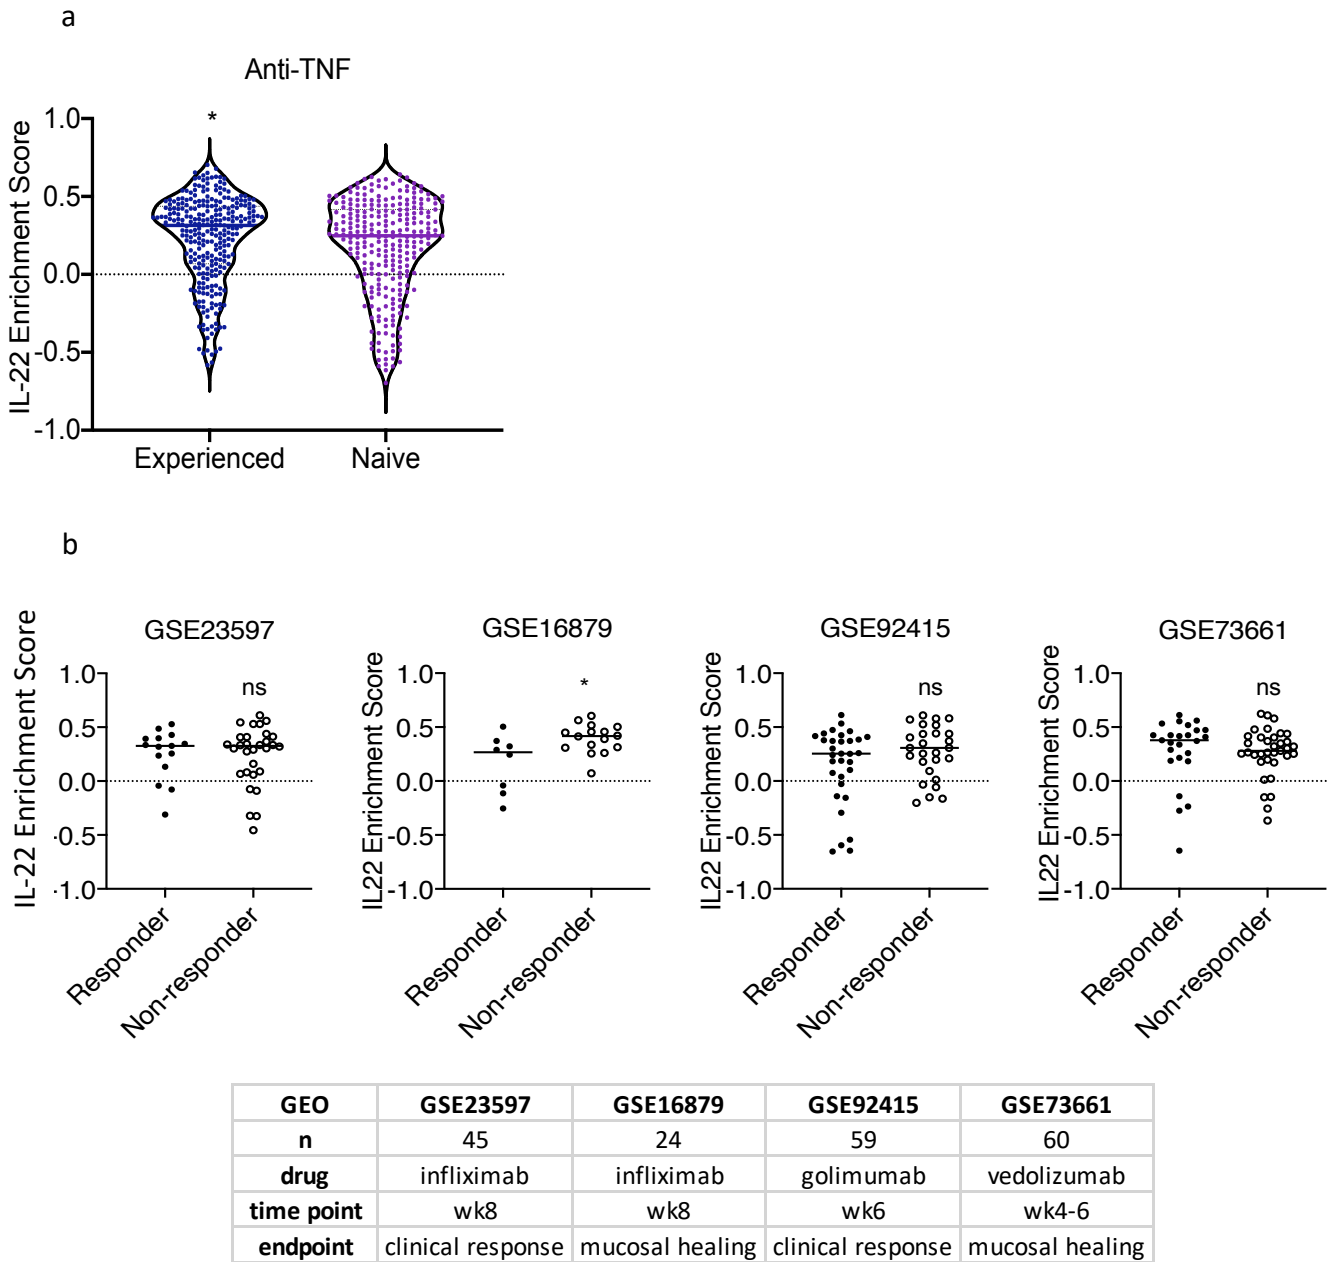

**Supplementary Figure 2. IL-22 regulated transcriptional program and response to other biologics in UC.** (a) IL-22 enrichment score in anti-TNF naive and experienced (failure) patients participating in UNIFI (n= 550, Mann Whitney, one-tailed, \*p=0.032, line representing median) (b) IL-22 enrichment score in biopsies of patients who were treated with an anti-TNF (GSE23597/GSE16879-infliximab, GSE92415-golimumab and GSE73661-vedolizumab, wk: week, Mann Whitney test, two-tailed, \*p<0.05). Source data for a and b are provided as a Source Data file.

### Supplementary Figure 3

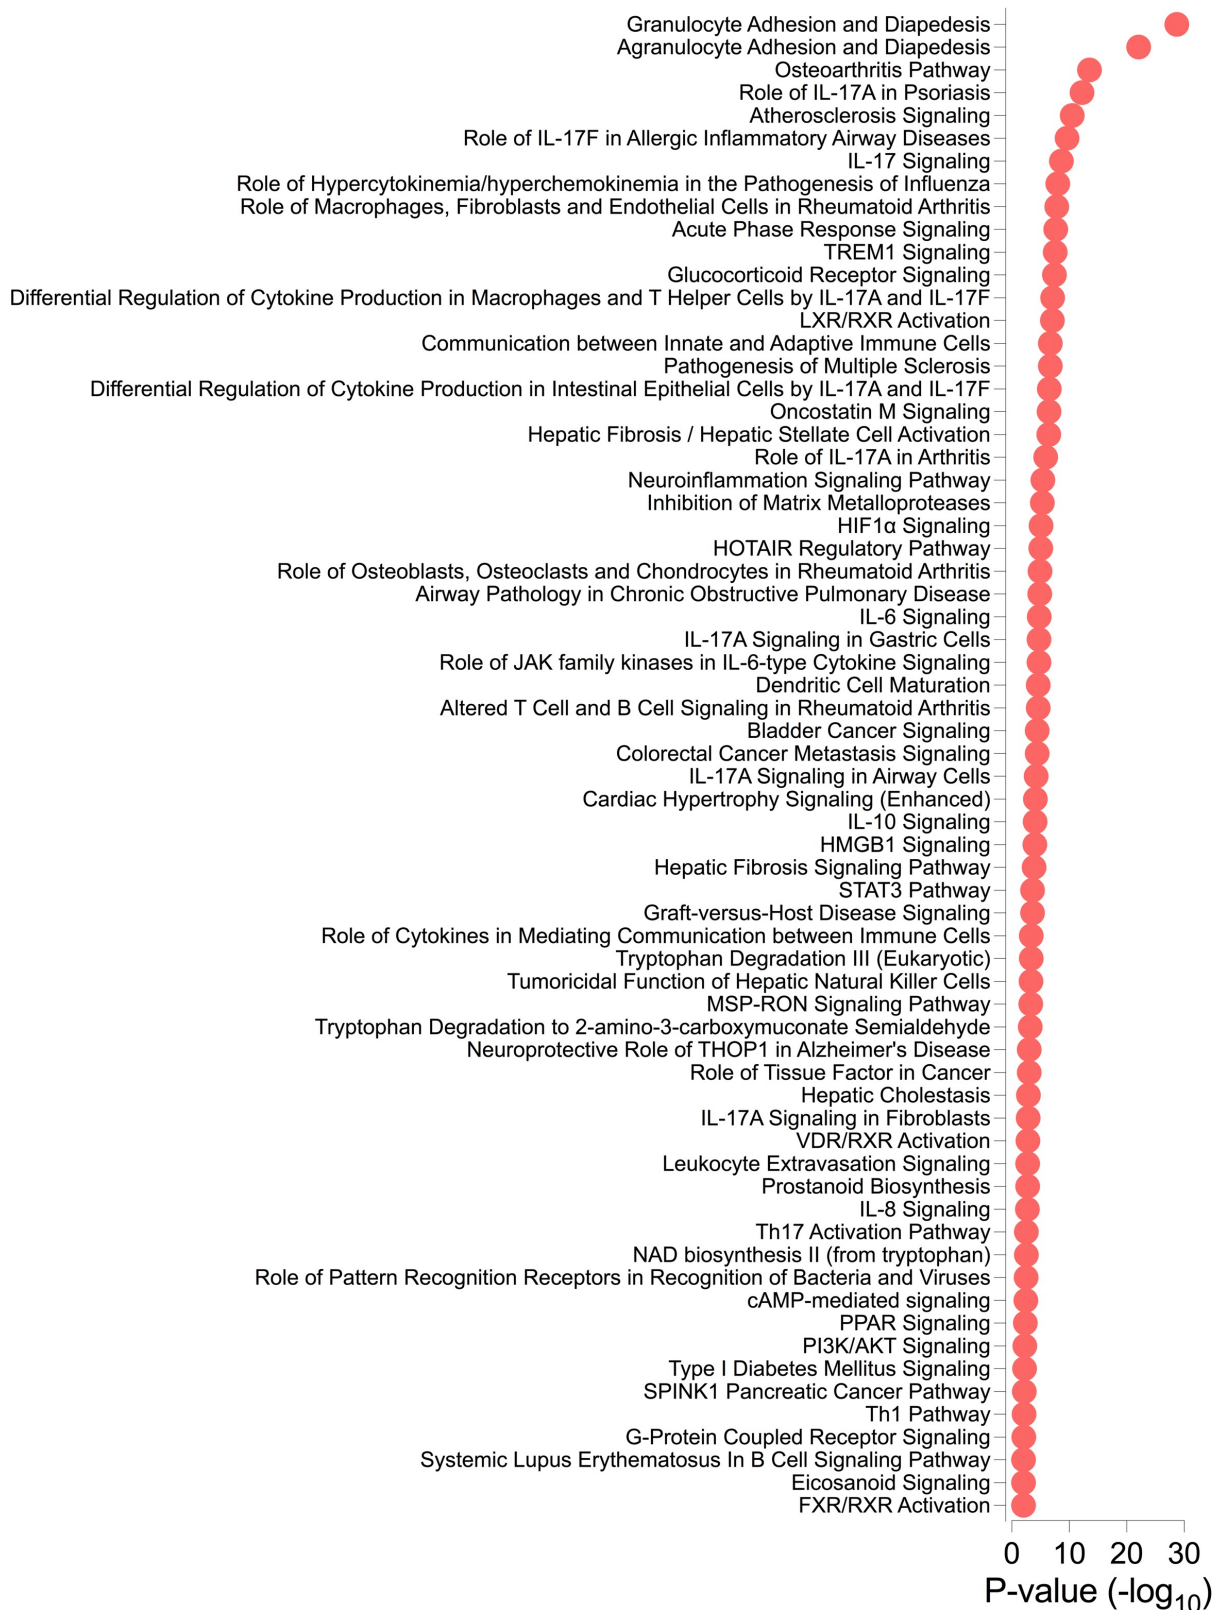

**Supplementary Figure 3.** Top, most significantly associated canonical pathways in patients with high IL-22 enrichment scores (ES) defined as IL-22 ES>0.25 (right tailed Fisher exact test), Ingenuity Pathway Analysis, IPA). Source data are provided as a Source Data file.

## Supplementary Figure 4

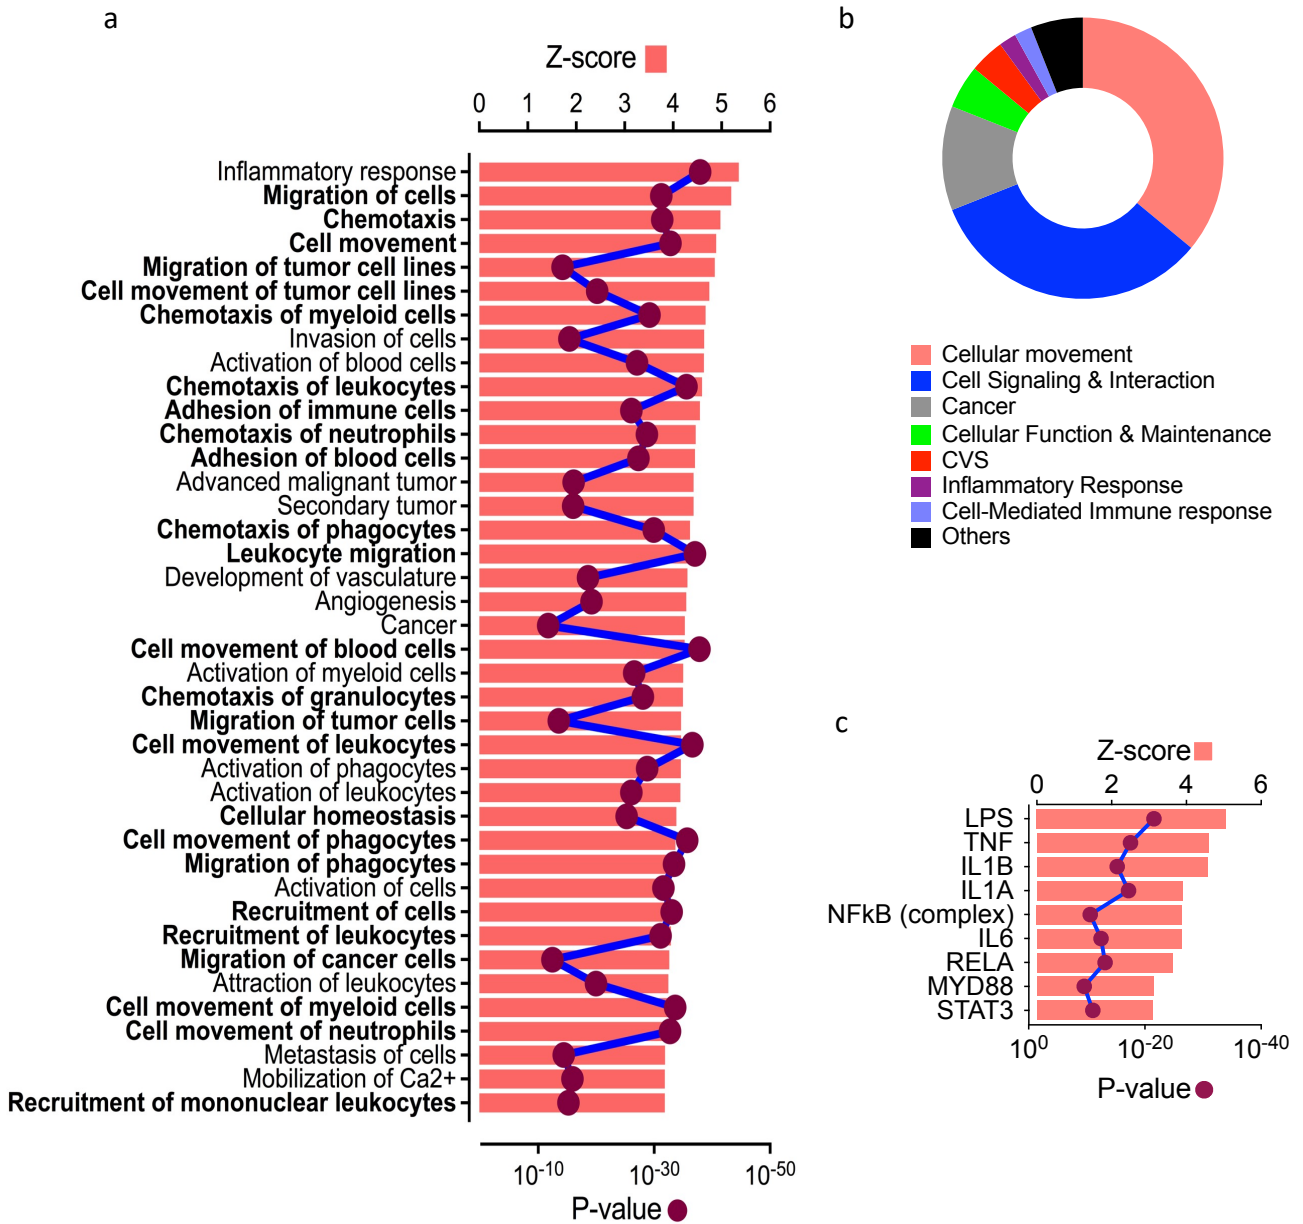

**Supplementary Figure 4: Bioinformatic analysis predicts causal effects and biological processes activated in patients with high IL-22 enrichment scores.** The IPA (ingenuity) Downstream Effects Analysis algorithm was used to define biological pathways activated in patients from the UNIFI cohort with high (IL-22 ES>0.25) and low IL-22 enrichment scores (IL-22 ES<0.25). (a) Top 40 pathways are identified and pathways involving cell trafficking are highlighted in bold (right tailed Fisher exact test). (b) Proportion of annotations with different high level categories in Molecular and Cellular Functions. (c) IPA upstream regulator analysis identified LPS, TNF and IL-1 $\beta$  as strongly predicted activators of the transcriptional program observed in patients with high IL-22 enrichment scores (right tailed Fisher exact test). Regulator effects analysis was performed on the top 3 predicted upstream activators (also see Figure 2C). Source data are provided as a Source Data file.

### Supplementary Figure 5

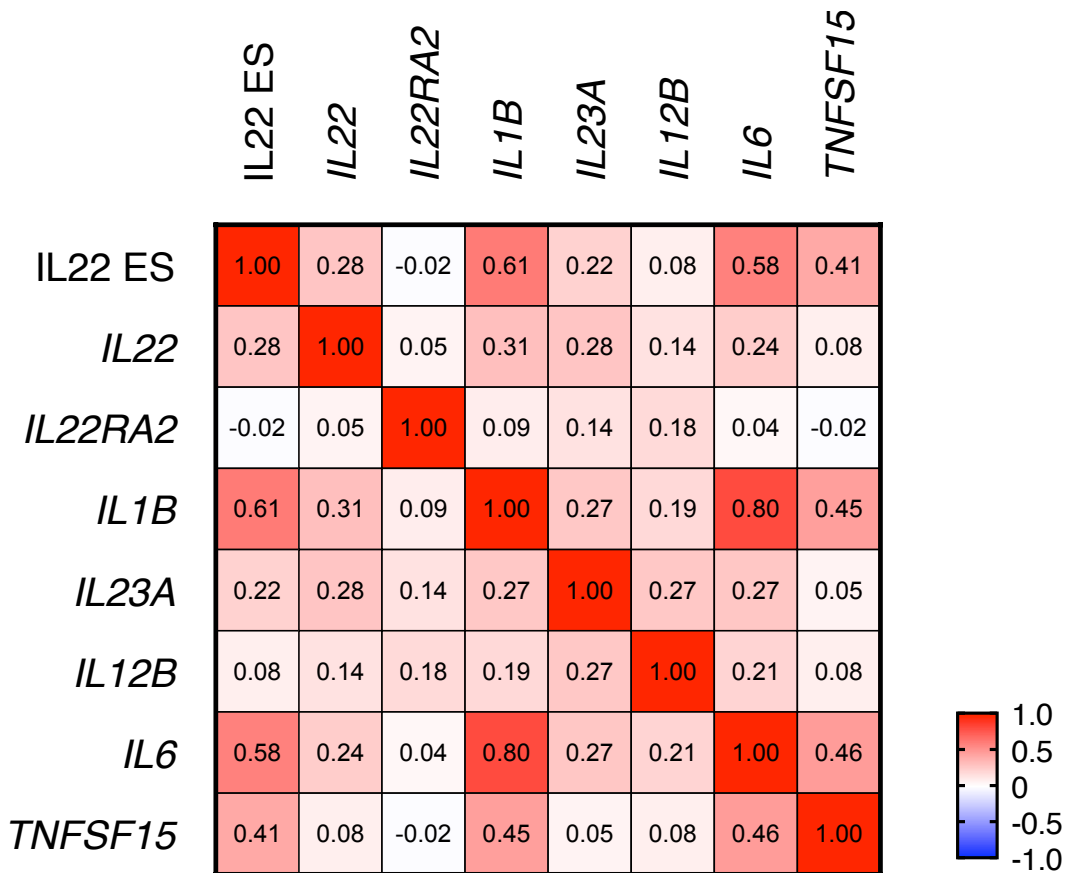

**Supplementary Figure 5. UC stratification by the IL-22 regulated transcriptional program is associated with key upstream regulators of IL-22 expression.** Correlation matrix (non-parametric Spearman  $r$ , two-tailed) of the key upstream regulators for *IL22* and the IL22 enrichment score (ES) including the expression of *IL22RA2*, coding the IL-22 binding protein (IL22BP), (UNIFI, UC,  $n=550$ ). Source data are provided as a Source Data file.

## Supplementary Figure 6

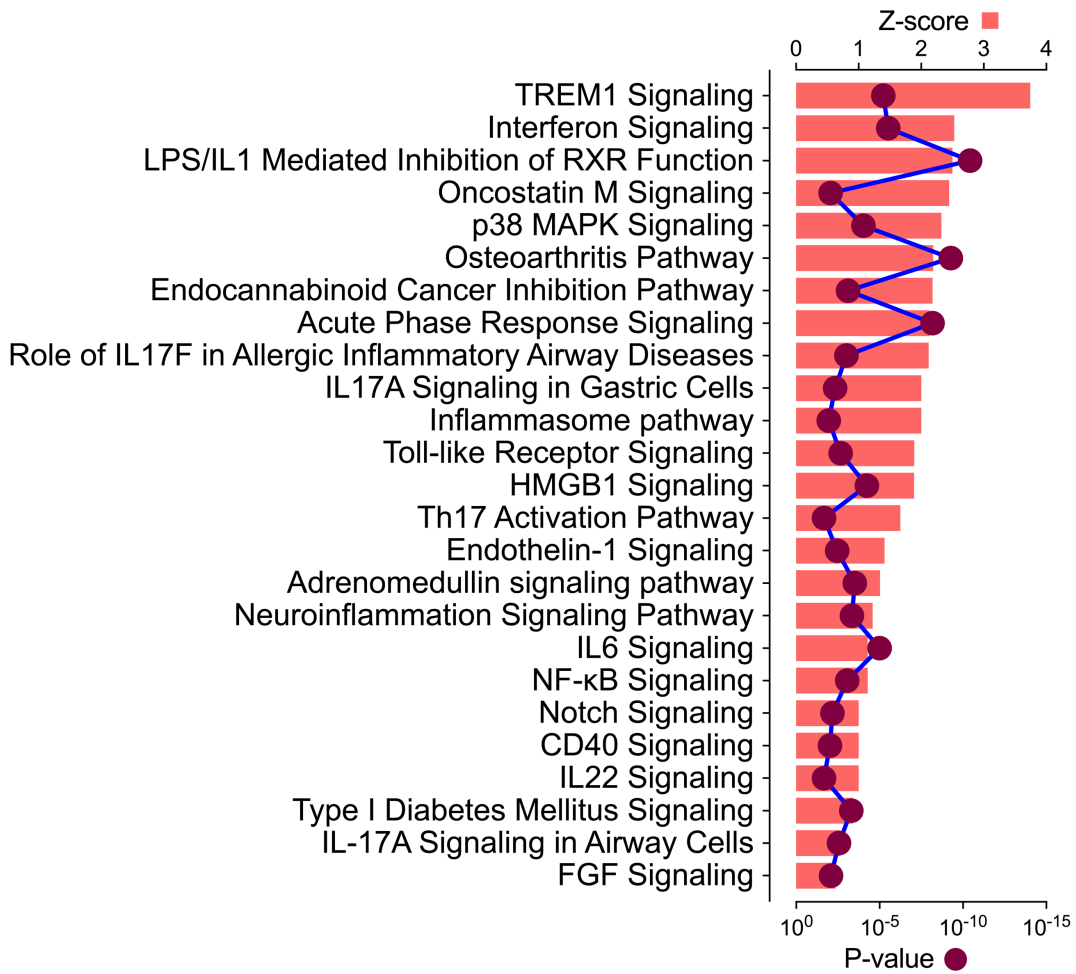

**Supplementary Figure 6: Canonical pathway analysis of the IL-22 transcriptional program.** IPA canonical pathway analysis of the IL-22 regulated transcriptional programme, top 25 results shown (right tailed Fisher exact test).

# Supplementary Figure 7

## Clinical Remission

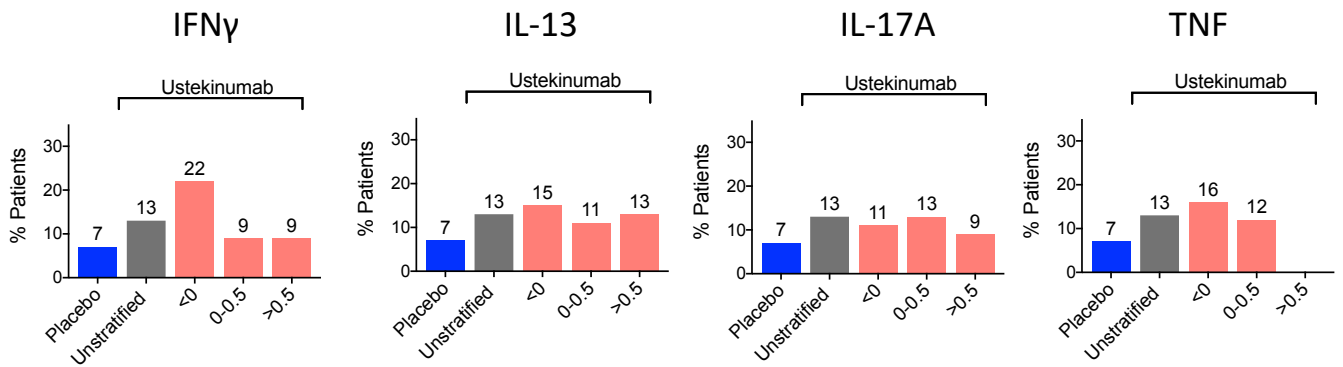

## Mucosal Healing

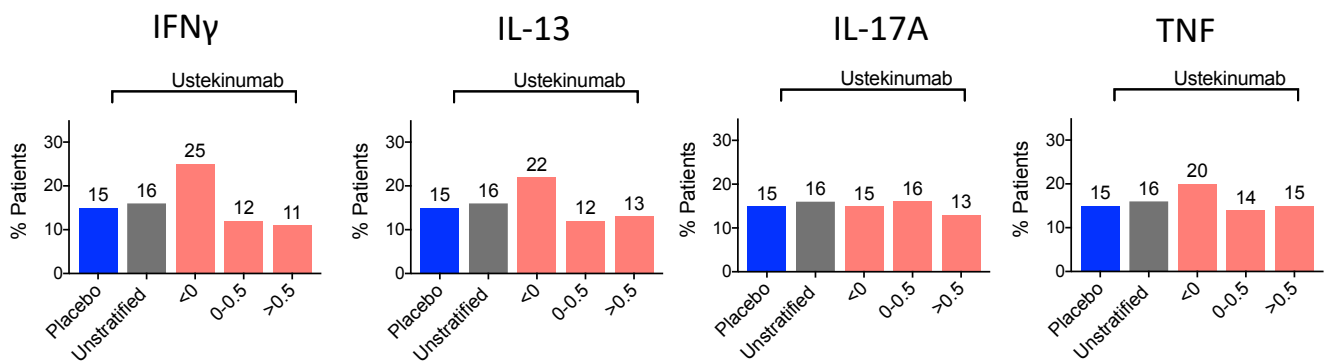

## Deep Remission

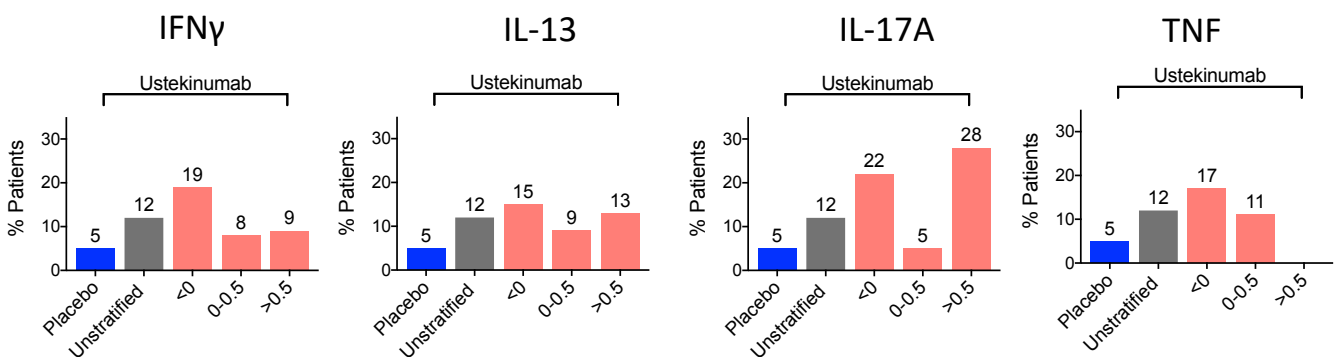

**Supplementary Figure 7. Expression of cytokine regulated transcriptional modules in colonic biopsies and association to response to ustekinumab in ulcerative colitis.** (A) Clinical remission (defined as a total Mayo score of  $\leq 2$  and no subscore  $>1$ ), mucosal healing defined as histologic improvement (neutrophil infiltration in  $<5\%$  of crypts, no crypt destruction, and no erosions, ulcerations, or granulation tissue) and endoscopic improvement (total Mayo score of  $\leq 2$  and no subscore  $>1$ ) and deep remission (which required both clinical remission and mucosal healing) at week 8 in UC patients enrolled in the UNIFI clinical trial program stratified according to cytokine regulated transcriptional programme enrichment score in baseline biopsies sampled immediately prior to initiation of ustekinumab ( $n=358$ ) or placebo ( $n=184$ ). Source data are provided as a Source Data file.



## Supplementary Figure 8

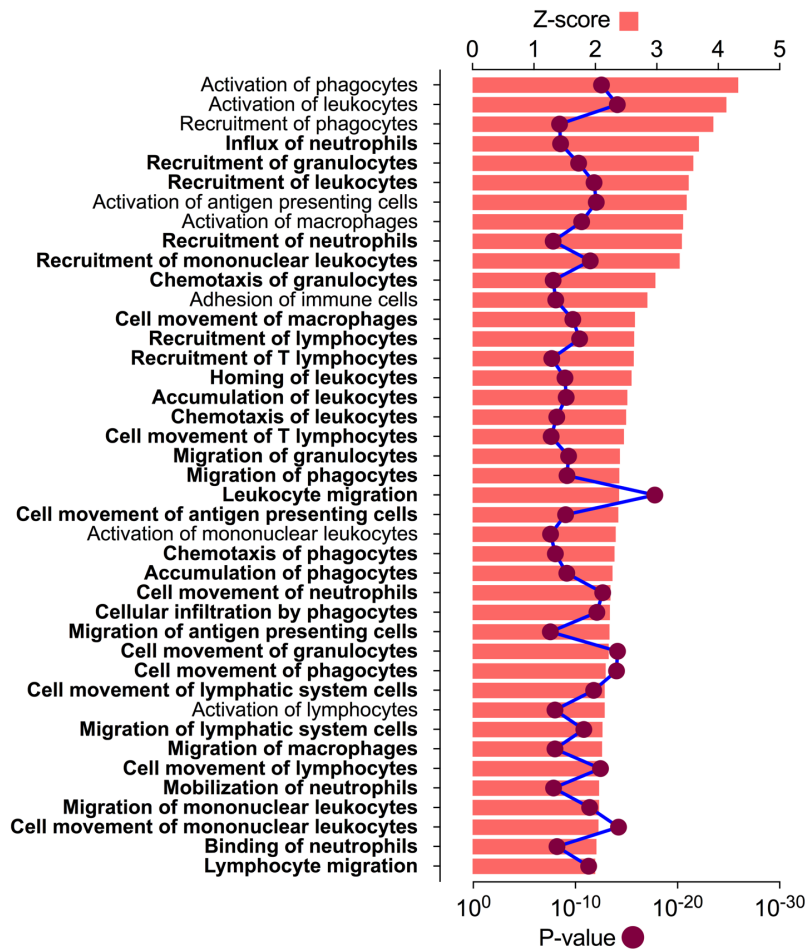

**Supplementary Figure 8: Pathway analysis highlights neutrophil chemotaxis as key pathway regulated by IL-22.** Diseases & Functions analysis of the IL-22 regulated transcriptional programme with IPA (Ingenuity), pathways comprising the immune cell trafficking pathway are shown (right tailed Fisher exact test).



## Supplementary Figure 9

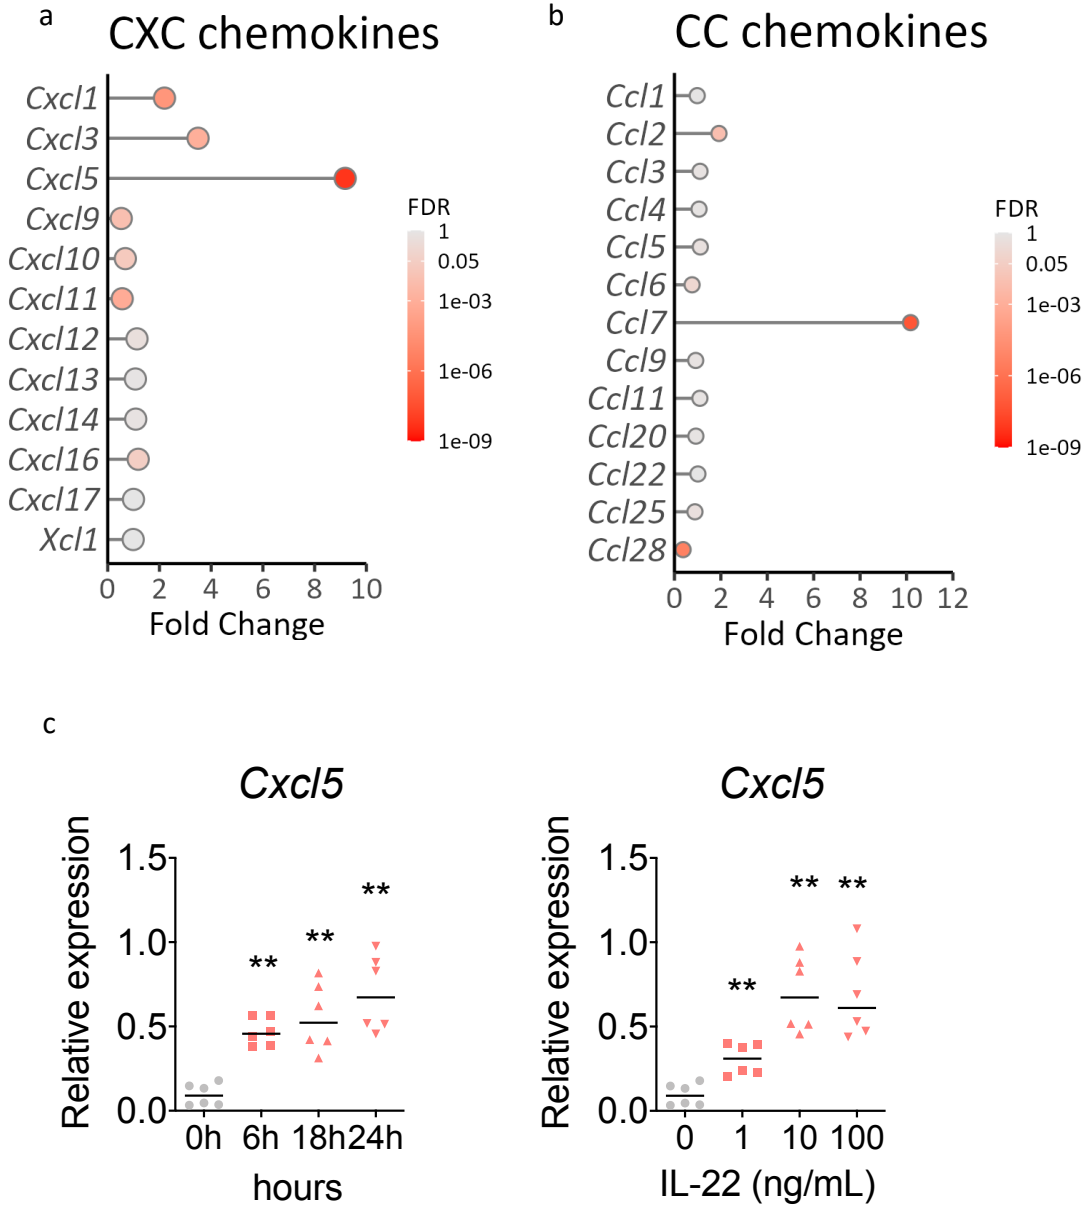

**Supplementary Figure 9: Selective regulation of neutrophil attracting chemokines in mouse colonoids by IL-22.** Relative expression of CXC (a) and CC (b) chemokine transcripts in mouse colonic organoids treated with IL-22 for 24hrs (n=5, biological replicates). (c) Validation of the RNAseq experiment using a commercially available primer for the neutrophil attracting chemokine *Cxcl5* (IL22 dose for time course: 10ng/mL). A positive time/dose association with IL-22 treatment was observed (n=6, biological replicates, Mann-Whitney, two tailed test, comparing each time point or concentration with baseline, \*\*p=0.002, line denotes: median). Source data for a, b and c are provided as a Source Data file.

## Supplementary Figure 10

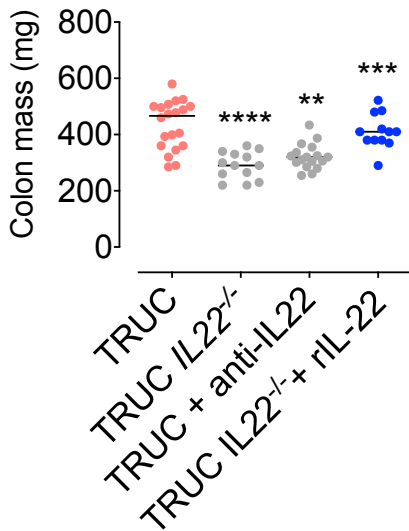

**Supplementary Figure 10: Pathogenic role of the IL22 mediated neutrophil chemotaxis axis in TRUC.** Loss or blockade of IL22 alleviate TRUC disease while supplementation with recombinant IL22 in the IL22 knock out TRUC model recapitulates disease (n=36, biological replicates, Kruskal Wallis with Dunn's multiple comparison test, TRUC *IL22*<sup>-/-</sup> vs TRUC, TRUC+anti\_IL22 vs. TRUC, \*\*\*\*p<0.0001, \*\*p<0.01 and Mann Whitney, two tailed test for TRUC *IL22*<sup>-/-</sup>+rIL-22 vs. TRUC+anti-IL22, \*\*\*p<0.001, line denotes median). Neutralizing anti-IL-22 mAb (clone IL22-01, 200µg per mouse) were administered intraperitoneally (ip) every 3 to 4 days. Recombinant IL22 (rIL22, 100µg per mouse) were administered ip at days 0, 4, 8 and 12. Source data are provided as a Source Data file.

## Supplementary Figure 11

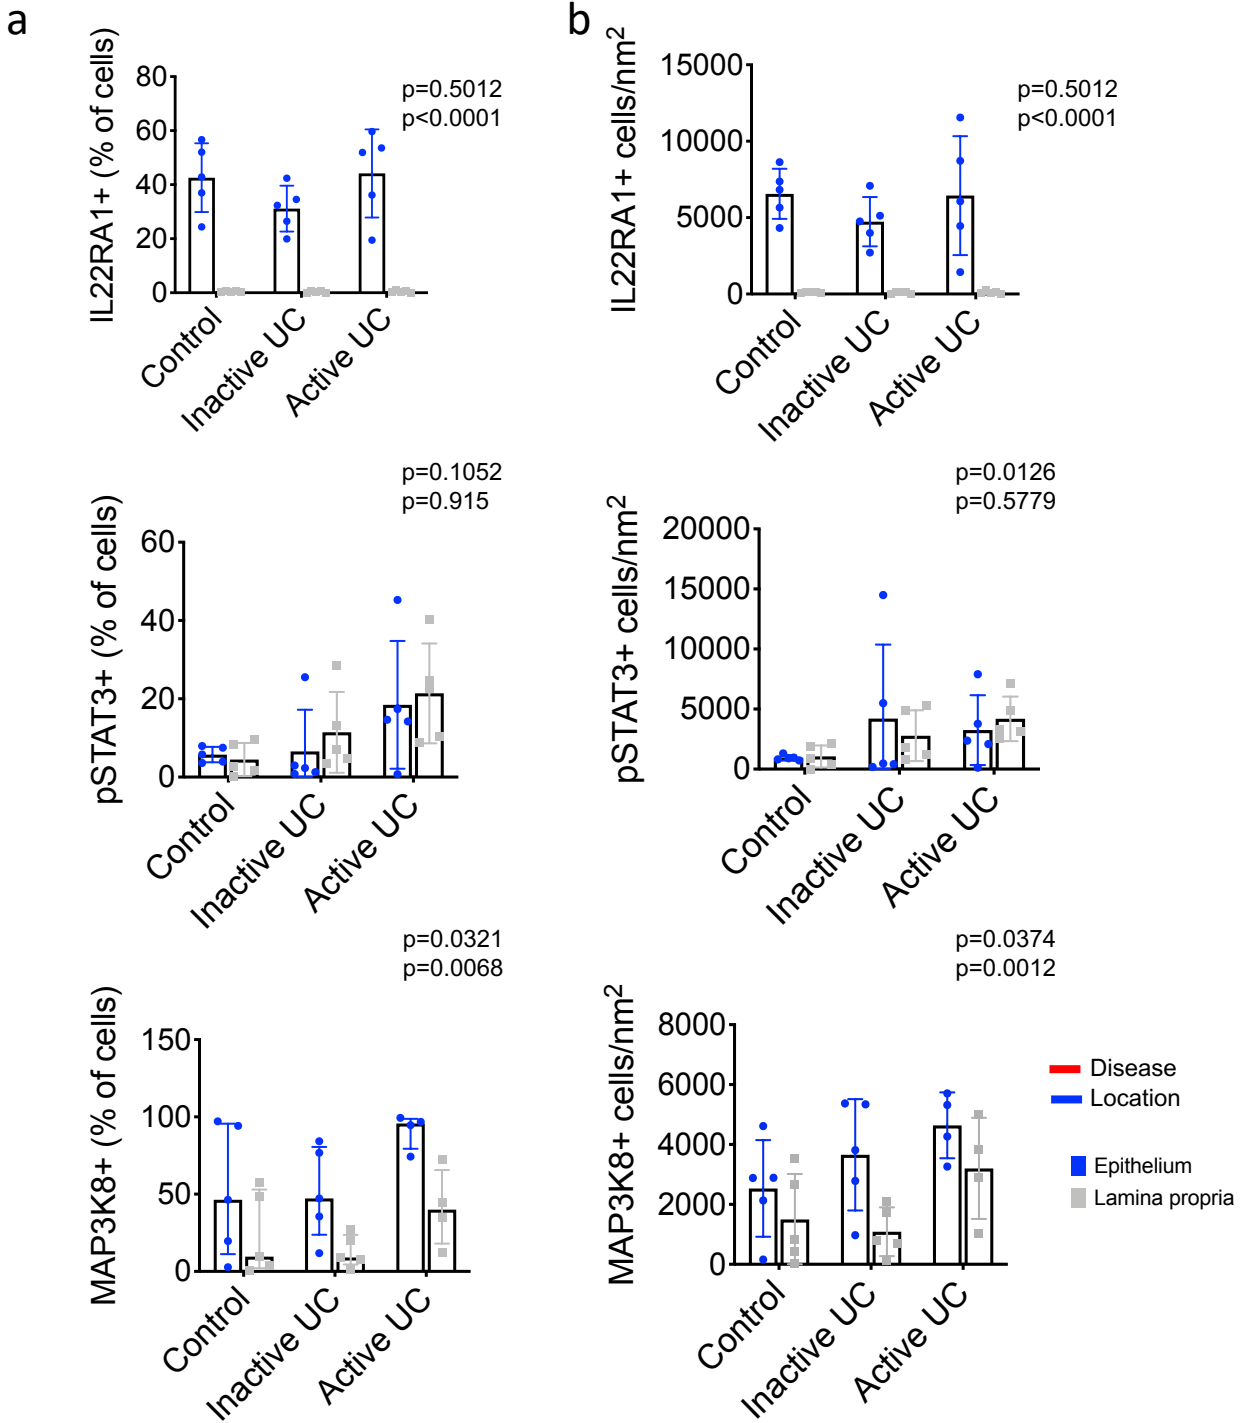

**Supplementary Figure 11: Immunostaining of IL22RA1, pSTAT3 and MAP3K8 in human colonic biopsies** (a) reported as cells/nm<sup>2</sup>, (b) reported as cell frequency, n=15 (five individuals per group), two-way ANOVA, mean with standard deviation, p values for comparison as per disease or location are provided. Source data for a and b are provided as a Source Data file.

## Supplementary Figure 12

### Representative gating strategy for LP Neutrophils

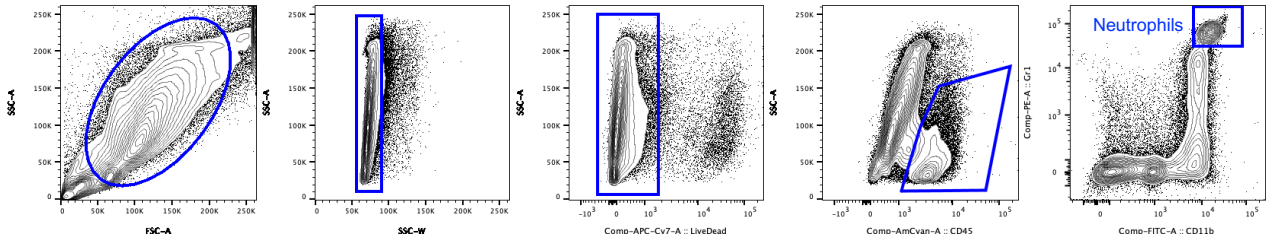

Supplementary Figure 12: Representative gating strategy for lamina propria neutrophils.

## Supplementary Figure 13

### Representative gating strategy for NCR- ILC3 FACS

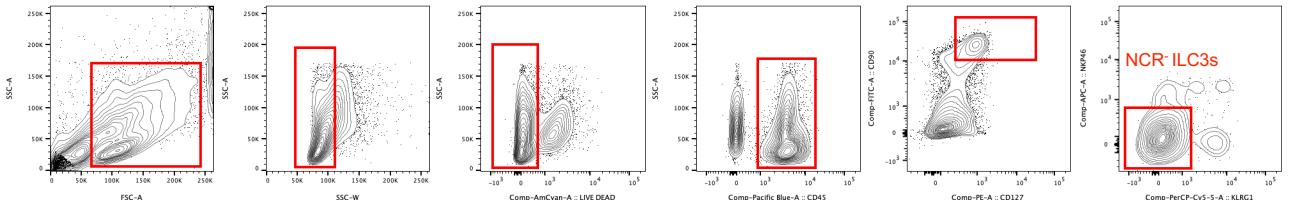

**Supplementary Figure 13: Representative gating strategy for NCR-ILC3 fluorescence-activated cell sorting.**

|                            |                     |
|----------------------------|---------------------|
|                            | UC                  |
| n                          | 550                 |
| age                        | 42                  |
| sex (F:M)                  | 35% : 65%           |
|                            |                     |
| Mayo score                 | 9 (8,12)            |
| Disease duration (years)   | 6 (3, 12)           |
| Previous antiTNF           | 50%                 |
|                            |                     |
| CRP                        | 4.6 (1.4, 12)       |
| Faecal Calprotectin (ug/g) | 1310 (560,<br>2594) |
| Faecal Lactoferrin (ug/g)  | 184 (60, 455)       |

**Supplementary Table 1** : UNIFI cohort- demographic data [median followed by range (min, max)].

| IFNGtop50 | IL17Atop50 | IL22top50 | TNFatop50 | IL13top50   |
|-----------|------------|-----------|-----------|-------------|
| IDO1      | SAA1       | DMBT1     | C3        | CCL26       |
| CXCL10    | SNPH       | SERPINA3  | CYP2A6    | ALOX15      |
| CXCL9     | SERPINB7   | REG1A     | SERPINA3  | TREML2      |
| GBP5      | FABP6      | REG1B     | SERPINB7  | CDH26       |
| NOS2      | LCN2       | HTRA1     | TMEM119   | LCT         |
| GBP4      | SAA2       | NOS2      | DRGX      | ITGA2B      |
| SERPING1  | IL1A       | SOCS3     | CLEC2D    | MMP1        |
| HLA-DPA1  | CCL20      | CFI       | NPTX1     | FLT1        |
| MS4A18    | IL17C      | DSG3      | CYP4Z1    | CAPN13      |
| WARS      | CXCL5      | PLA2G2A   | CCL2      | SH2D1B      |
| CD274     | PI3        | TNIP3     | KLHDC7B   | LGR6        |
| PLA2G2A   | PDZK1IP1   | TIFA      | CYP2A7    | WNT5B       |
| CIITA     | VSIG1      | HTR3A     | TNFRSF9   | FHOD3       |
| OAS2      | CA4        | LYPD1     | SPIB      | SLC26A4     |
| HAPLN3    | PPBP       | IFITM3    | NCCRP1    | SLIT2       |
| IL18BP    | NOS2       | TGM2      | CYP4X1    | SOCS1       |
| CX3CL1    | MIR146A    | SLC9B2    | LTB       | POMC        |
| CD7       | LGALS2     | IFITM1    | UNC13A    | FSTL4       |
| IFI44L    | DUOXA2     | PDZK1IP1  | CX3CL1    | WFDC21P     |
| HLA-DPB1  | MTNR1A     | GRIN3A    | SERPINA5  | AIF1        |
| HLA-DQA1  | IL13RA2    | SERPINA1  | CYP2B7P   | SNPH        |
| CXCL11    | IL1RL1     | ALPPL2    | IL36B     | ANKRD33B    |
| HLA-DRA   | CXCL6      | STMN3     | ALOX15B   | C1QTNF1     |
| GBP1P1    | CSF2       | WNT5A     | GBP4      | CCL24       |
| CPA2      | FSTL1      | SLC5A8    | CSF2      | SORCS2      |
| ZBP1      | DNM3       | OLFM4     | TTN       | MUC6        |
| HLA-DMB   | MMP10      | HEG1      | NPR1      | DNAH9       |
| BST2      | VNN2       | FSTL1     | SLC30A2   | NPR1        |
| TRPV6     | PRRX2      | FLNC      | PI3       | RGS2        |
|           |            |           |           | C1QTNF1-AS1 |
| HLA-DOA   | SEMG1      | ENKUR     | PRRX2     | AS1         |
| LGALS17A  | SH2D1B     | C2CD4A    | UBD       | ADAM19      |
| IFIT3     | VNN1       | CARD14    | MYH7      | TMOD2       |
| GBP1      | ANXA6      | GPR37     | MMP10     | LINC01913   |
| CHRD      | ZC3H12C    | MMP10     | DACT2     | CYP2B6      |
| SECTM1    | CXCL1      | IL1R1     | SPX       | CCL15       |
| ISG15     | CCL28      | CITED4    | ICAM1     | ATP12A      |
| MDGA1     | APOA1      | PRUNE2    | TNF       | TRPV6       |
| CD74      | CXCL8      | ECEL1P2   | LAYN      | LINC00330   |
| EPST1     | DUOX2      | GBP4      | SCNN1B    | GJB6        |
| RARRES3   | LRRTM1     | KCNN2     | SLC5A2    | LBH         |
| CMPK2     | DEFB1      | CASP5     | ARHGAP31  | DNAH12      |
| RSAD2     | MMP7       | TRPV6     | KCNE1     | HSD3B1      |
| CCL22     | ANXA1      | KRT6A     | EGOT      | LINC02577   |
| UBE2L6    | PKIG       | NAV3      | ESYT3     | NLRP3       |
| MXRA5     | CPNE5      | TMEM173   | NEB       | SNORD104    |
| HLA-DQB1  | C4BPA      | OSMR      | SV2B      | CD7         |
| MUC16     | ADTRP      | STEAP4    | CCL22     | SNCAIP      |
|           |            |           |           | LOC101927   |
| MMP25     | ZC3H12A    | IL13RA2   | CHST2     | 531         |
| IFITM1    | RND1       | PLEKHF1   | IL23A     | OVOS2       |
| LYPD5     | MT1G       | LYPD5     | PLAU      | CFI         |

**Supplementary Table 2:** Cytokine gene signatures defined as the top 50 upregulated transcripts by each cytokine in human colonoids



| Chemicals, Peptides, Recombinant Proteins and Monoclonal Antibodies |                     |                              |
|---------------------------------------------------------------------|---------------------|------------------------------|
| Advanced DMEM/F-12                                                  | Gibco               | 12634010                     |
| GlutaMAX                                                            | Gibco               | 11574466                     |
| HEPES                                                               | Gibco               | 15630049                     |
| Penicillin/Streptomycin                                             | Sigma-Aldrich       | P4333                        |
| Wnt3a conditioned medium                                            | In-house production | -                            |
| R-spondin 1 conditioned medium                                      | In-house production | -                            |
| Recombinant murine Noggin                                           | Peptotech           | 250-38-100                   |
| B27 Supplement                                                      | Gibco               | 17504044                     |
| N2 Supplement                                                       | Gibco               | 17502048                     |
| N-Acetylcysteine                                                    | Sigma-Aldrich       | A9165                        |
| EGF Recombinant Mouse Protein                                       | Gibco               | PMG8041                      |
| Nicotinamide                                                        | Sigma-Aldrich       | N0636                        |
| Gastrin                                                             | Sigma-Aldrich       | G9145                        |
| A 83-01                                                             | Bio-Techne          | 2939                         |
| SB-202190                                                           | Sigma-Aldrich       | S7067                        |
| Y-27632                                                             | Sigma-Aldrich       | Y0503                        |
| CHIR99021                                                           | Sigma-Aldrich       | SML1046                      |
| EDTA                                                                | Invitrogen          | 15575-038                    |
| Matrigel                                                            | Corning             | 356231                       |
| Cell Recovery Solution                                              | Corning             | 354253                       |
| RNase-Free DNase Set                                                | Qiagen              | 79254                        |
| RPMI                                                                | Gibco               | 11875-093                    |
| Collagenase D                                                       | Roche               | 11088882001                  |
| Dispase II                                                          | Roche               | 4942078001                   |
| DNase                                                               | ROCHE               | 10104159001                  |
| Percoll                                                             | GE Healthcare       | 17-0891-01                   |
| Recombinant human IL-17A                                            | Bio-Techne          | 7955-IL                      |
| Recombinant human TNF                                               | Bio-Techne          | 210-TA                       |
| Recombinant human IFN $\gamma$                                      | Bio-Techne          | 285-IF                       |
| Recombinant human IL-13                                             | Bio-Techne          | 213-ILB                      |
| Recombinant mouse IL-2                                              | Biolegend           | 589102                       |
| Recombinant mouse IL-7                                              | Biolegend           | 577802                       |
| Recombinant mouse IL-23                                             | Biolegend           | 589002                       |
| Recombinant IL-1 $\beta$                                            | Biolegend           | 401-ML-005                   |
| anti-IL22                                                           | Pfizer              | Clone IL22-01                |
| Recombinant IL-22                                                   | Pfizer              | (not commercially available) |
| Anti-CXC2                                                           | R&D Systems         | Clone 242216                 |
| Anti-IL22RA                                                         | Novus Biologicals   | NBP2-38496                   |
| pSTAT3                                                              | RabMAb              | EP2147Y (ab76315)            |
| MAP3K8                                                              | Thermo Fisher       | PA5-21650                    |

| Commercial assays and primers                         |                          |                   |
|-------------------------------------------------------|--------------------------|-------------------|
| RNeasy Mini Kit                                       | Qiagen                   | 74104             |
| Qubit RNA BR assay kit                                | Thermo Fisher Scientific | Q10210            |
| Bioanalyzer RNA 6000 Nano Kit                         | Agilent                  | 5067-1511         |
| NEBNext® Ultra™ RNA Library Prep Kit for<br>Illumina® | New England Biolabs      | E7530L            |
| HG U133 PM array                                      | Affymetrix               |                   |
| CXCL1 Elisa kit                                       | R&D Systems              | DY453             |
| CXCL5 Elisa kit                                       | R&D Systems              | DY443             |
| Cxcl1 primer                                          | IDT Technologies         | Designed to order |
| Cxcl5 primer                                          | IDT Technologies         | Designed to order |

| Flow cytometry reagents |                 |         |                |            |          |
|-------------------------|-----------------|---------|----------------|------------|----------|
| Antigen                 | Fluorochrome    | Clone   | Source         | Cat No     | Dilution |
| CD4                     | BV786           | RM4-5   | BD Biosciences | 563727     | 1:200    |
| CD4                     | FITC            | GK1.5   | BD Biosciences | 553729     | 1:200    |
| CD11b                   | FITC            | M1/70   | BD Biosciences | 568688     | 1:200    |
| CD25                    | APC             | PC61.5  | eBioscience    | 17-0251-82 | 1:200    |
| CD44                    | PE              | IM7     | eBioscience    | 12-0441-82 | 1:200    |
| CD45                    | Pac orange      | 30-F11  | Invitrogen     | MCD4530    | 1:200    |
| CD45                    | V500            | 30-F11  | BD Biosciences | 561487     | 1:200    |
| CD62L                   | Pac Blue        | MEL-14  | Biolegend      | 104424     | 1:200    |
| CD127                   | APC             | A7R34   | eBioscience    | 17-1271-82 | 1:200    |
| CD127                   | BUV737          | SB/199  | BD Biosciences | 612841     | 1:200    |
| Gr-1                    | PE              | RB6-8C5 | eBioscience    | 12-5931-82 | 1:200    |
| Gr-1                    | APC-Cy7         | RB6-8C5 | eBioscience    | A15424     | 1:200    |
| KLRG1                   | PerCP-eFlour710 | 2F1     | eBioscience    | 46-5893-82 | 1:100    |
| NKp46                   | PE-Cy7          | 29A1.4  | eBioscience    | 25-3351-82 | 1:200    |

**Supplementary Table 3: Reagent list**
